# Supplementary material for: HNC0014, a Multi-Targeted Small-Molecule, Inhibits Head and Neck Squamous Cell Carcinoma by Suppressing c-Met/STAT3/CD44/PD-L1 Oncoimmune Signature and Eliciting Antitumor Immune Responses
Source: MDPI journal article supplement (doi:10.3390/cancers12123759), 2020-12-14
Supplement: s1 [file s1]

**Table S1:** Primary antibodies and experimental conditions used in this study

|                  | Target             | Dilution | Company and Catalog No.                                    | Predicted MW (kDa) | Observed MW (kDa) |
|------------------|--------------------|----------|------------------------------------------------------------|--------------------|-------------------|
| 01               | GAPDH              | 1:5000   | Proteintech, GAPDH Rabbit pAb, 10494-1-AP                  | 36                 | 36                |
| 02               | c-Met              | 1:1000   | Proteintech, c-Met Rabbit pAb, 19971-1-AP                  | 156                | 140               |
| 03               | STAT3              | 1:1000   | Proteintech, STAT3 Rabbit pAb, 10253-1-AP                  | 79-86              | 79-86~100         |
| 04               | CD44               | 1:1000   | Invitrogen, CD44 Mouse mAb, MA5-13890                      | 81                 | 81                |
| 05               | PD-L1              | 1:1000   | Proteintech, PD-L1 Mouse mAb, 66248-1-Ig                   | 33                 | 45-50             |
| 06               | STAT3 <sup>p</sup> | 1:1000   | Cellsignal, p-STAT3 Rabbit mAb, #9145s                     | 79-86              | 79-86             |
| 07               | Alix               | 1:1000   | Abcam, Alix Rabbit pAb, ab76608                            | 96                 | 96                |
| 08               | $\beta$ -catenin   | 1:1000   | Cell Signaling, $\beta$ -Catenin (6B3) Rabbit mAb, #9582P  | 92                 | 100               |
| 09               | Vimentin           | 1:1000   | Cloud Clone, Vimentin Rabbit pAb, PAB040Hu01               | 52-58              | 52-58             |
| 10               | $\alpha$ -SMA      | 1:1000   | Proteintech, $\alpha$ -SMA Rabbit pAb, 14395-1-AP          | 43                 | 43                |
| 11               | FAP                | 1:1000   | MYBioSource, FAP alpha (MBS8244119) Rabbit pAb, MBS8241750 | 80-100             | 80-100            |
| 12               | PARP               | 1:1000   | CellSignaling, PARP (46D11) Rabbit mAb #9532               | 116, 89            | 116, 89           |
| 13               | Caspase 3          | 1:1000   | Abcam, Recombinant Anti-Caspase-3 Rabbit mAb, ab184787     | 32                 | 17-32             |
| 14               | c-Met <sup>p</sup> | 1:1000   | Cell signaling, Phospho-Met Rabbit mAb, 3077S              | 145                | 145               |
| 15               | $\alpha$ -tubulin  | 1:1000   | Abcam, Anti-alpha Tubulin antibody(ab185067)               | 50                 | 52                |
| Mouse antibodies |                    |          |                                                            |                    |                   |
| 01               | C-MET              | 1:1000   | abcam, c-Met rabbit mAb, ab51067                           | 156                | 160               |
| 02               | CD44               | 1:1000   | abcam, CD44 rabbit mAb, ab189524                           | 82                 | 82                |
| 03               | PD-L1              | 1:1000   | abcam, PD-L1 rabbit mAb, ab213480                          | 33                 | 40-60             |

|    |                    |        |                                               |        |     |
|----|--------------------|--------|-----------------------------------------------|--------|-----|
| 04 | STAT3 <sup>p</sup> | 1:1000 | abcam, p-STAT3 rabbit mAb, ab76315            | 88     | 88  |
| 05 | Alix               | 1:1000 | abcam, Alix rabbit mAb, ab275377              | 90-100 | 96  |
| 06 | c-Met <sup>p</sup> | 1:1000 | Cell signaling, Phospho-Met Rabbit mAb, 3077S | 145    | 145 |
