# Supplementary figures and images for: HNC0014, a Multi-Targeted Small-Molecule, Inhibits Head and Neck Squamous Cell Carcinoma by Suppressing c-Met/STAT3/CD44/PD-L1 Oncoimmune Signature and Eliciting Antitumor Immune Responses
Source: MDPI journal article supplement (doi:10.3390/cancers12123759), 2020-12-14

Figure 2

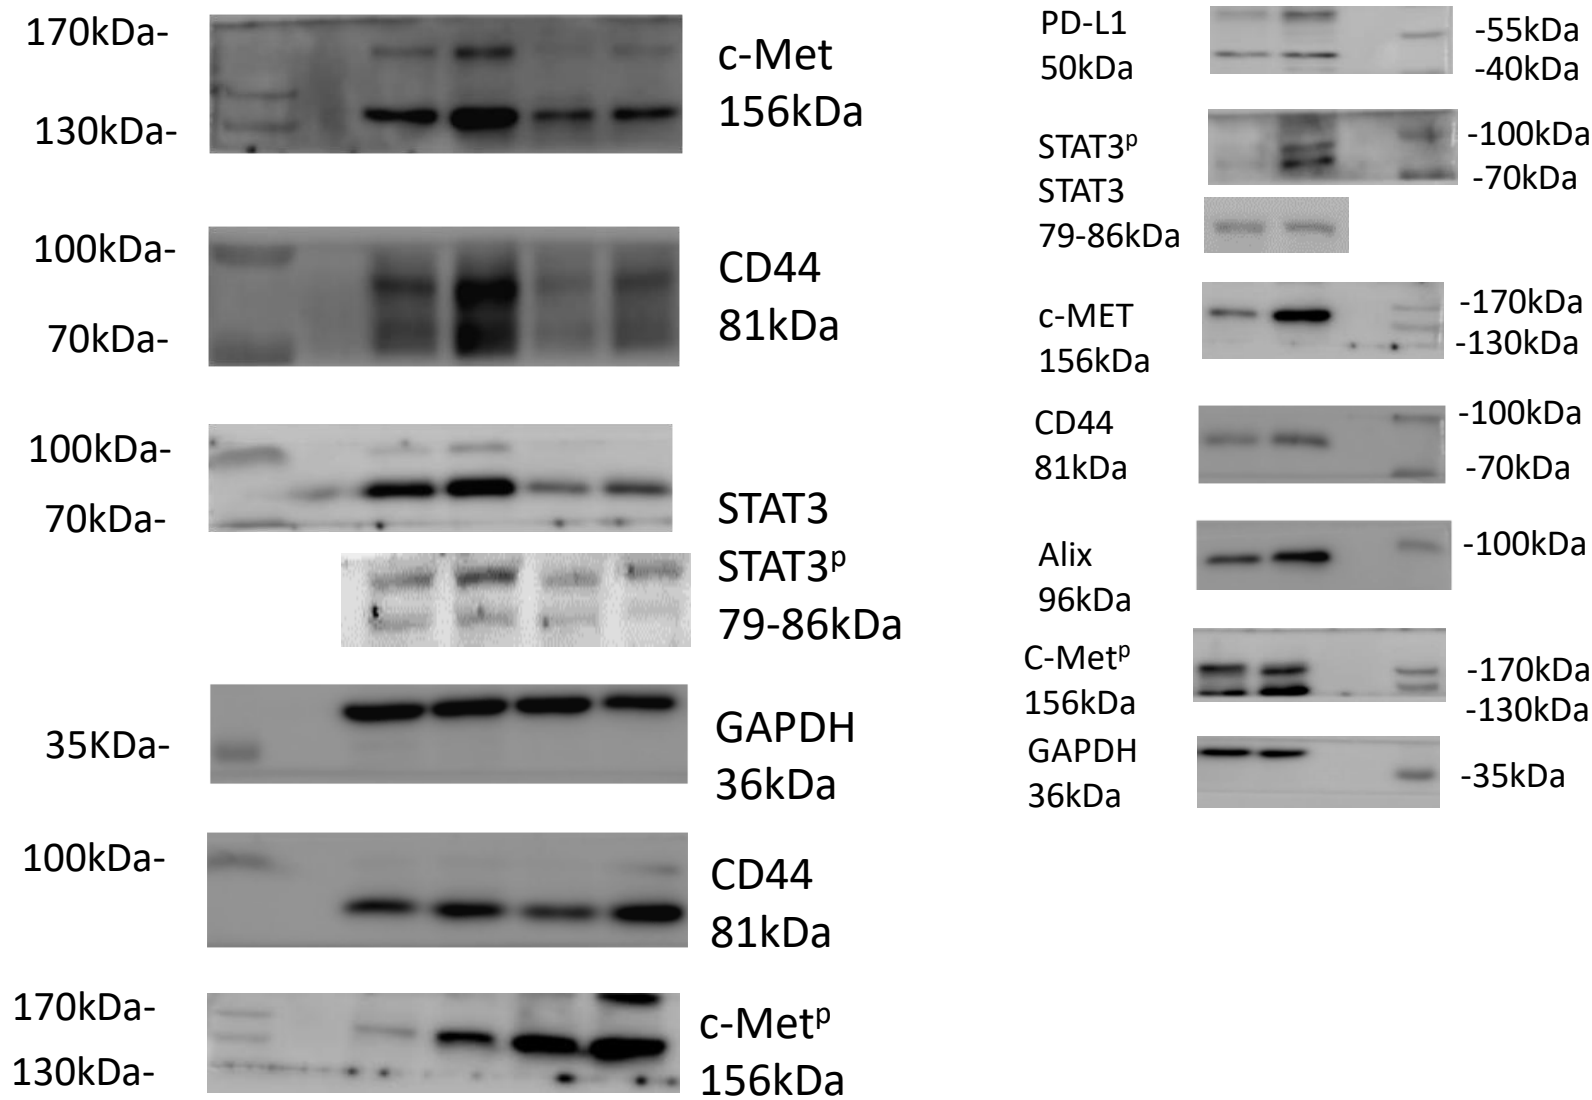

# Figure 3

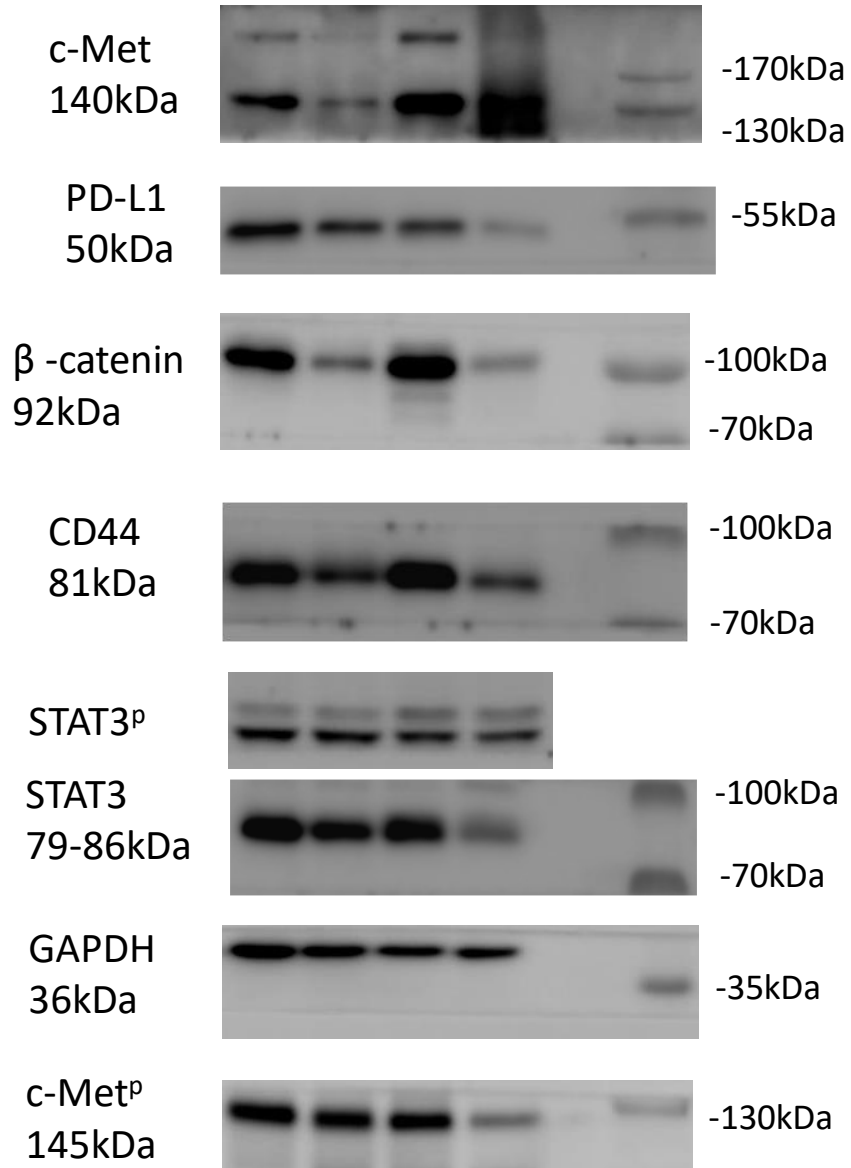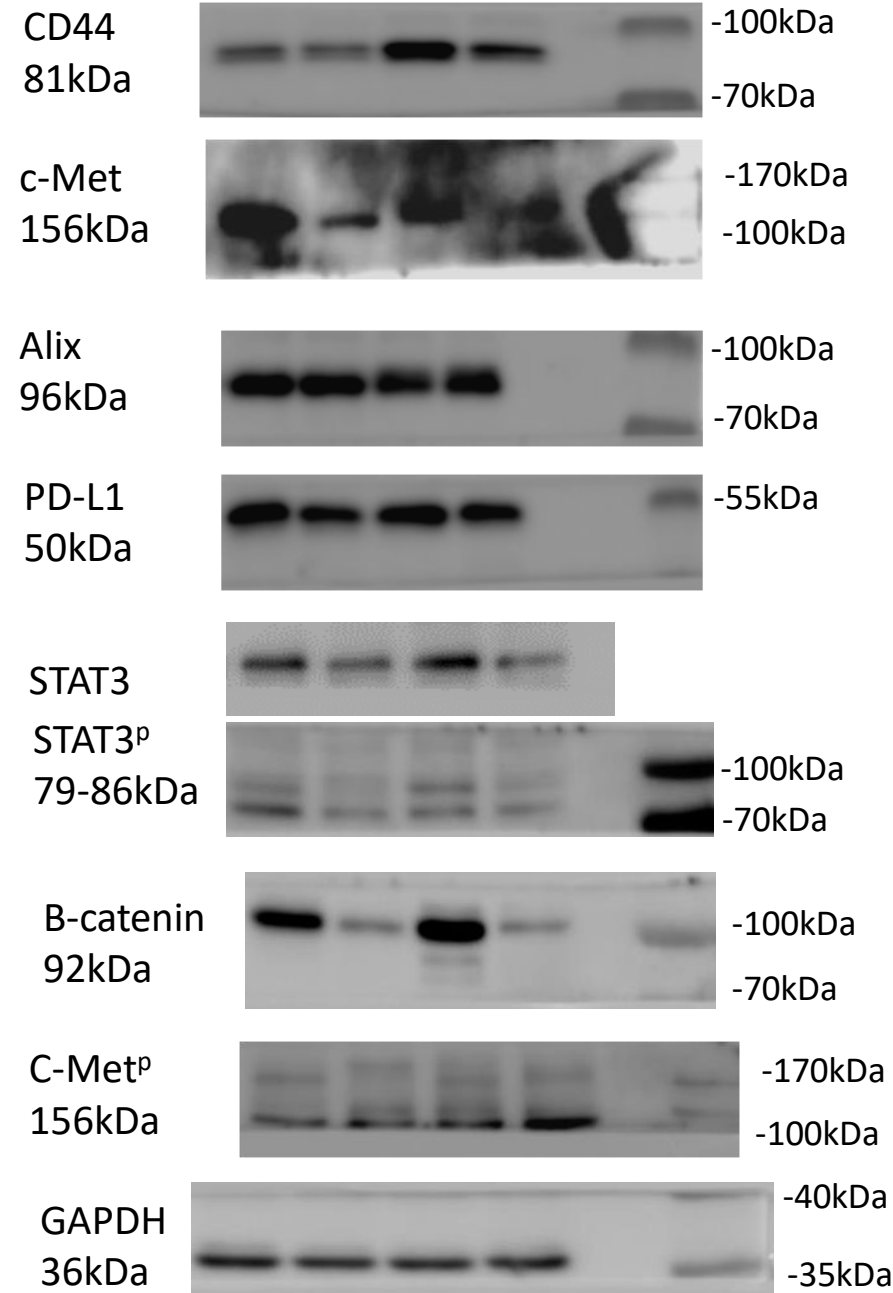

Figure 4

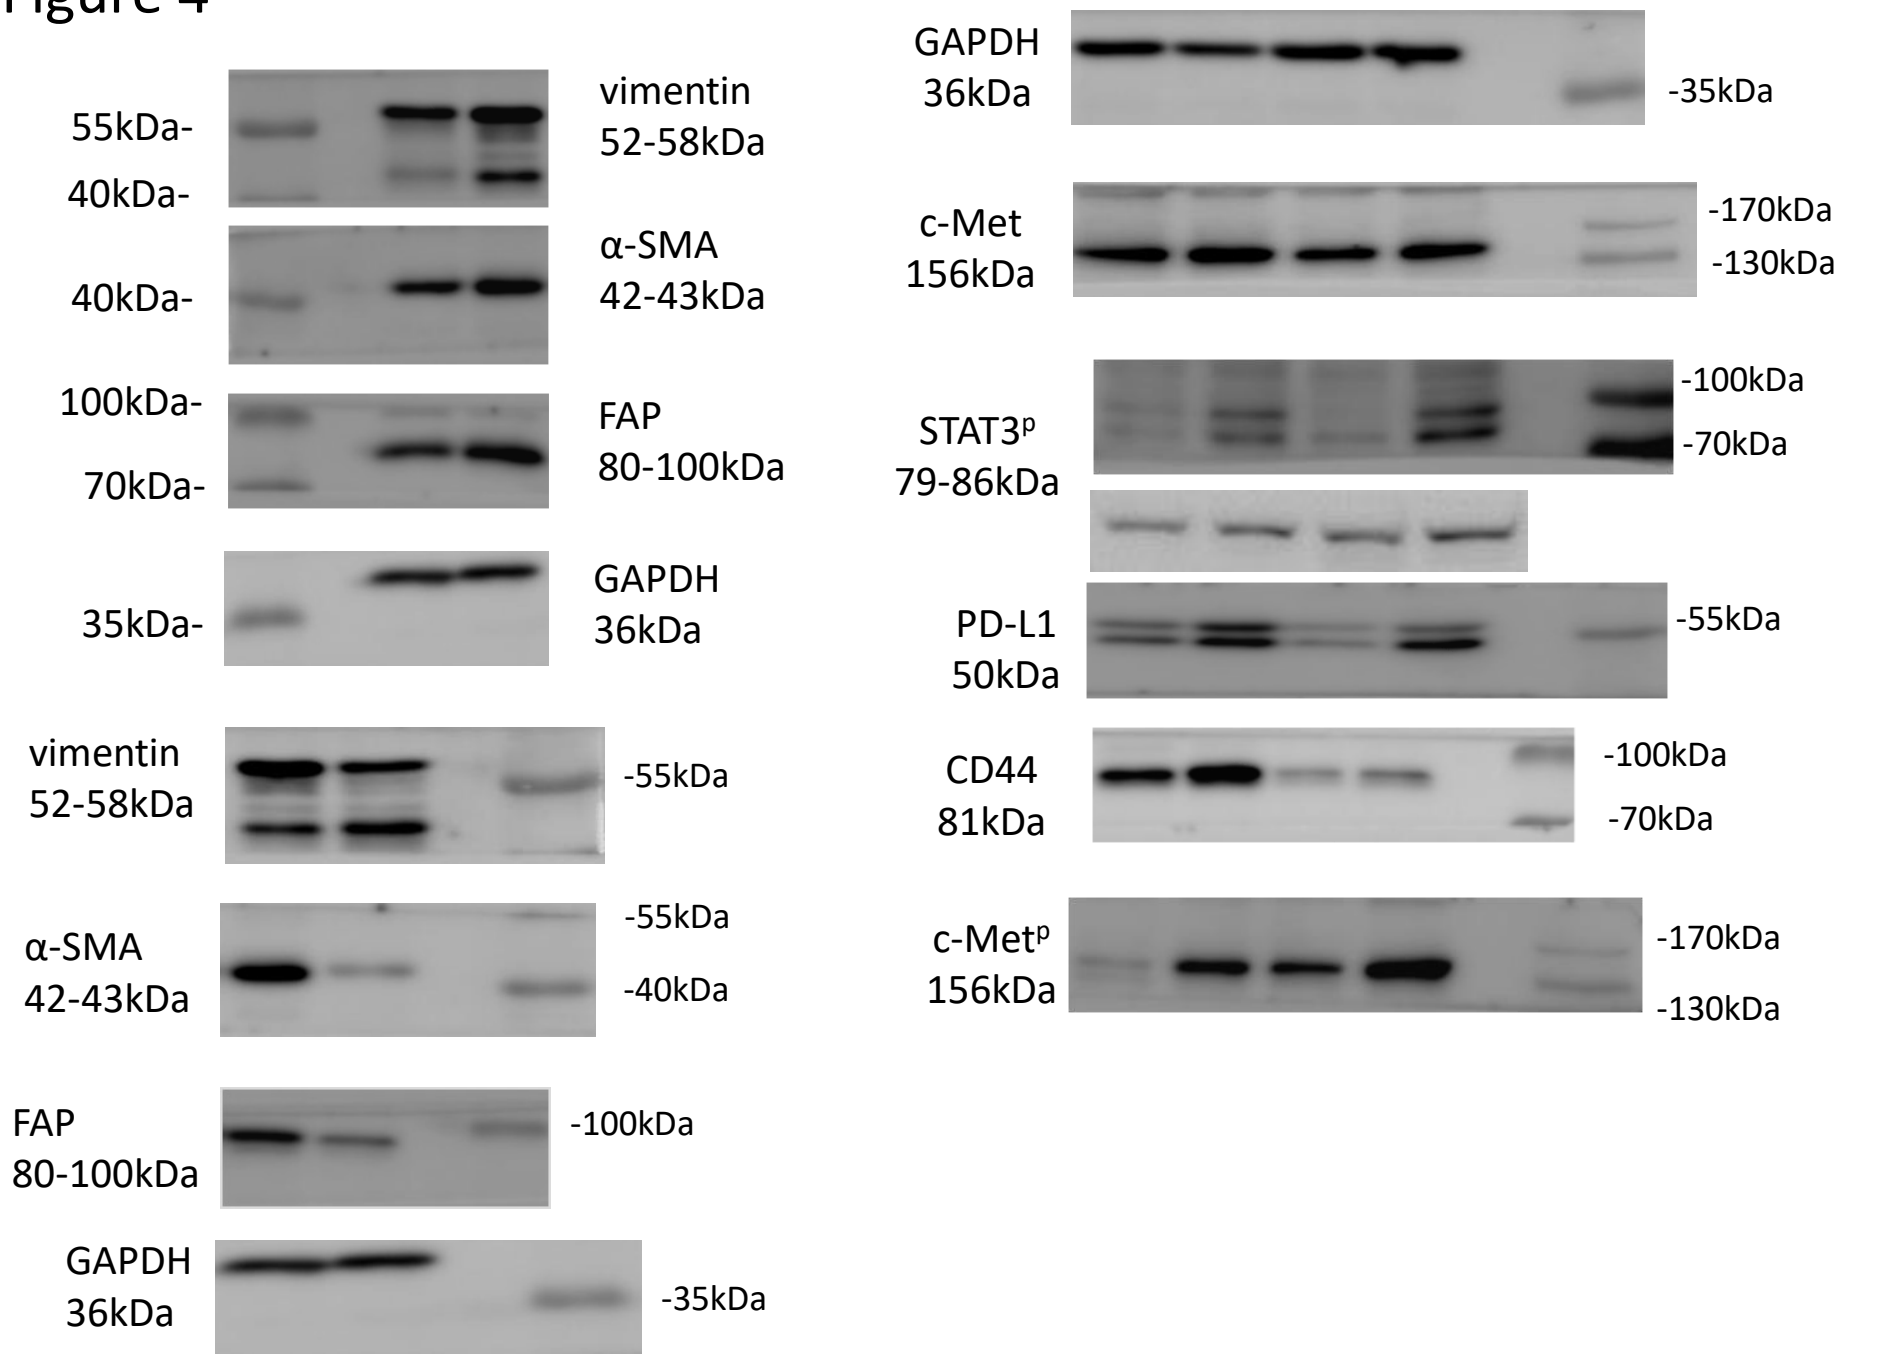

Figure 5

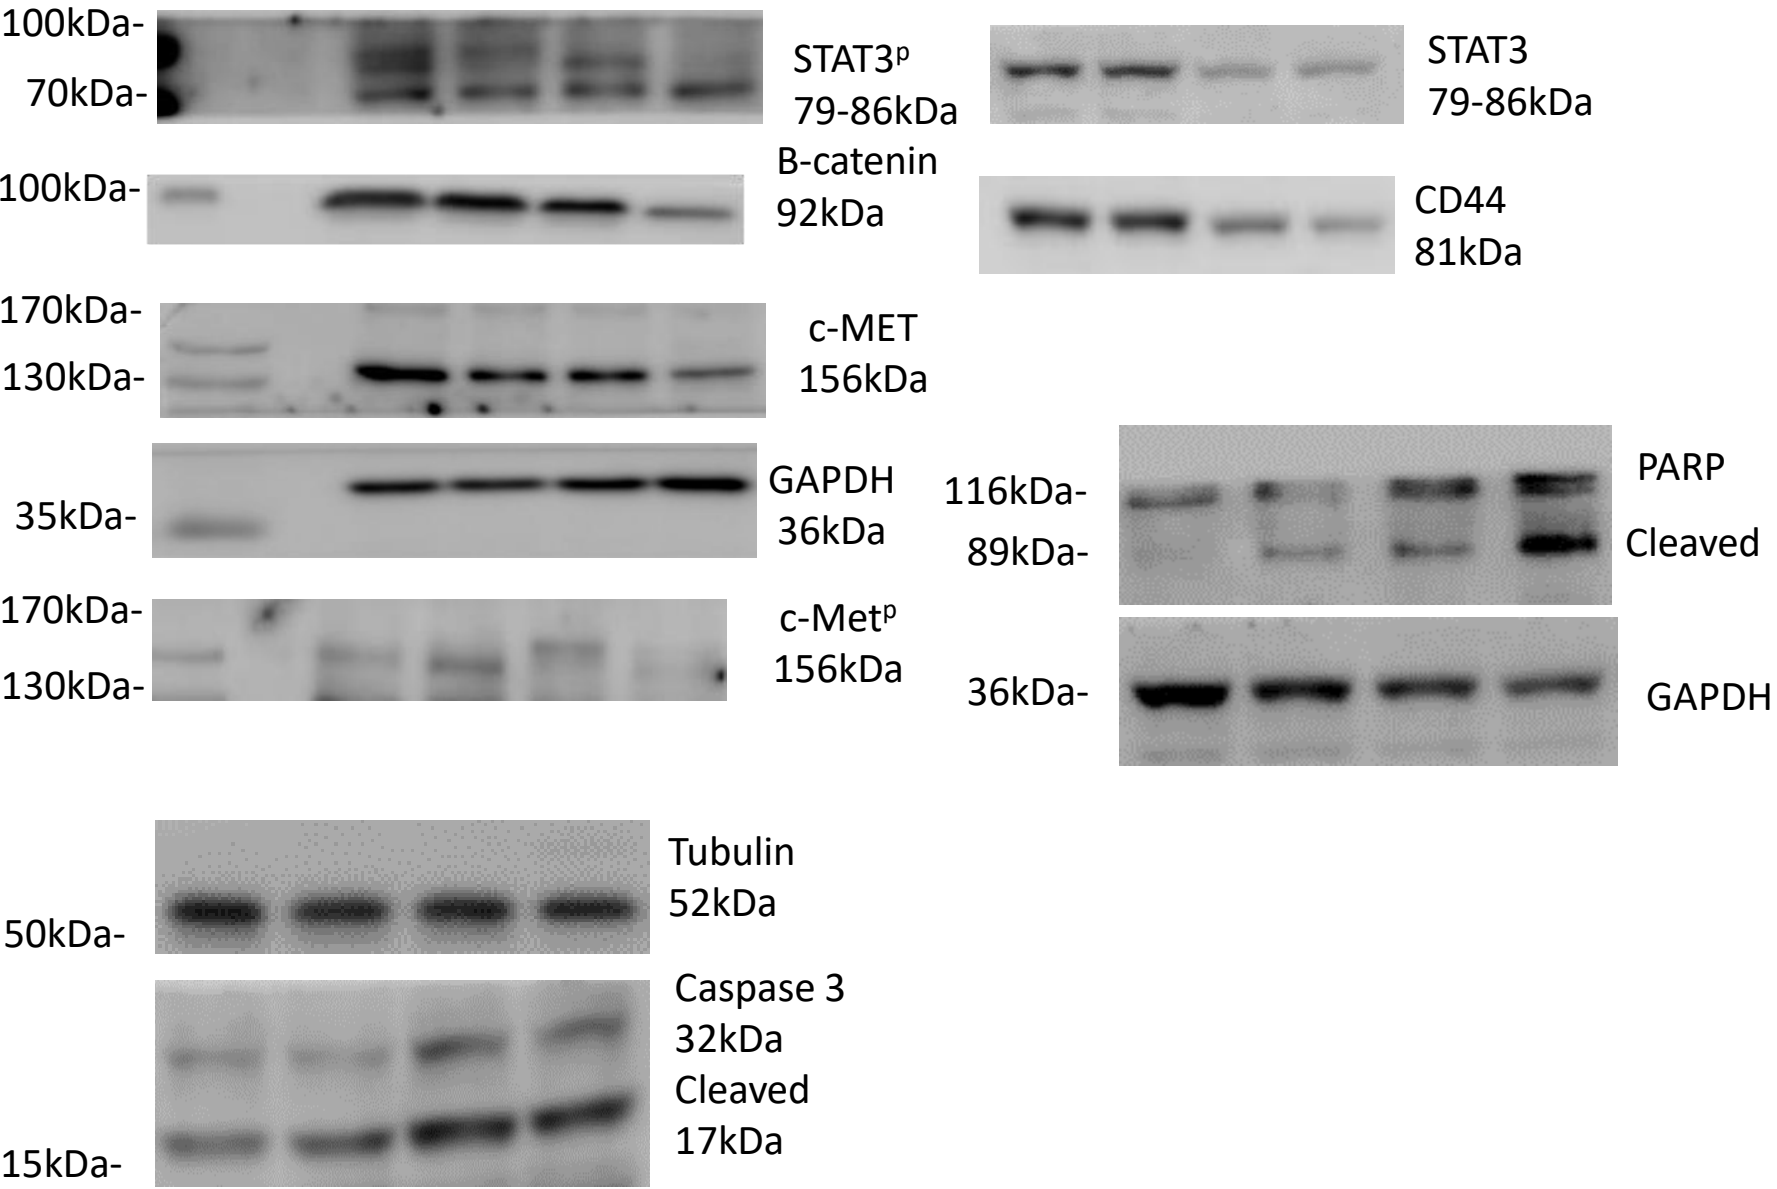

Figure 5 Conti.

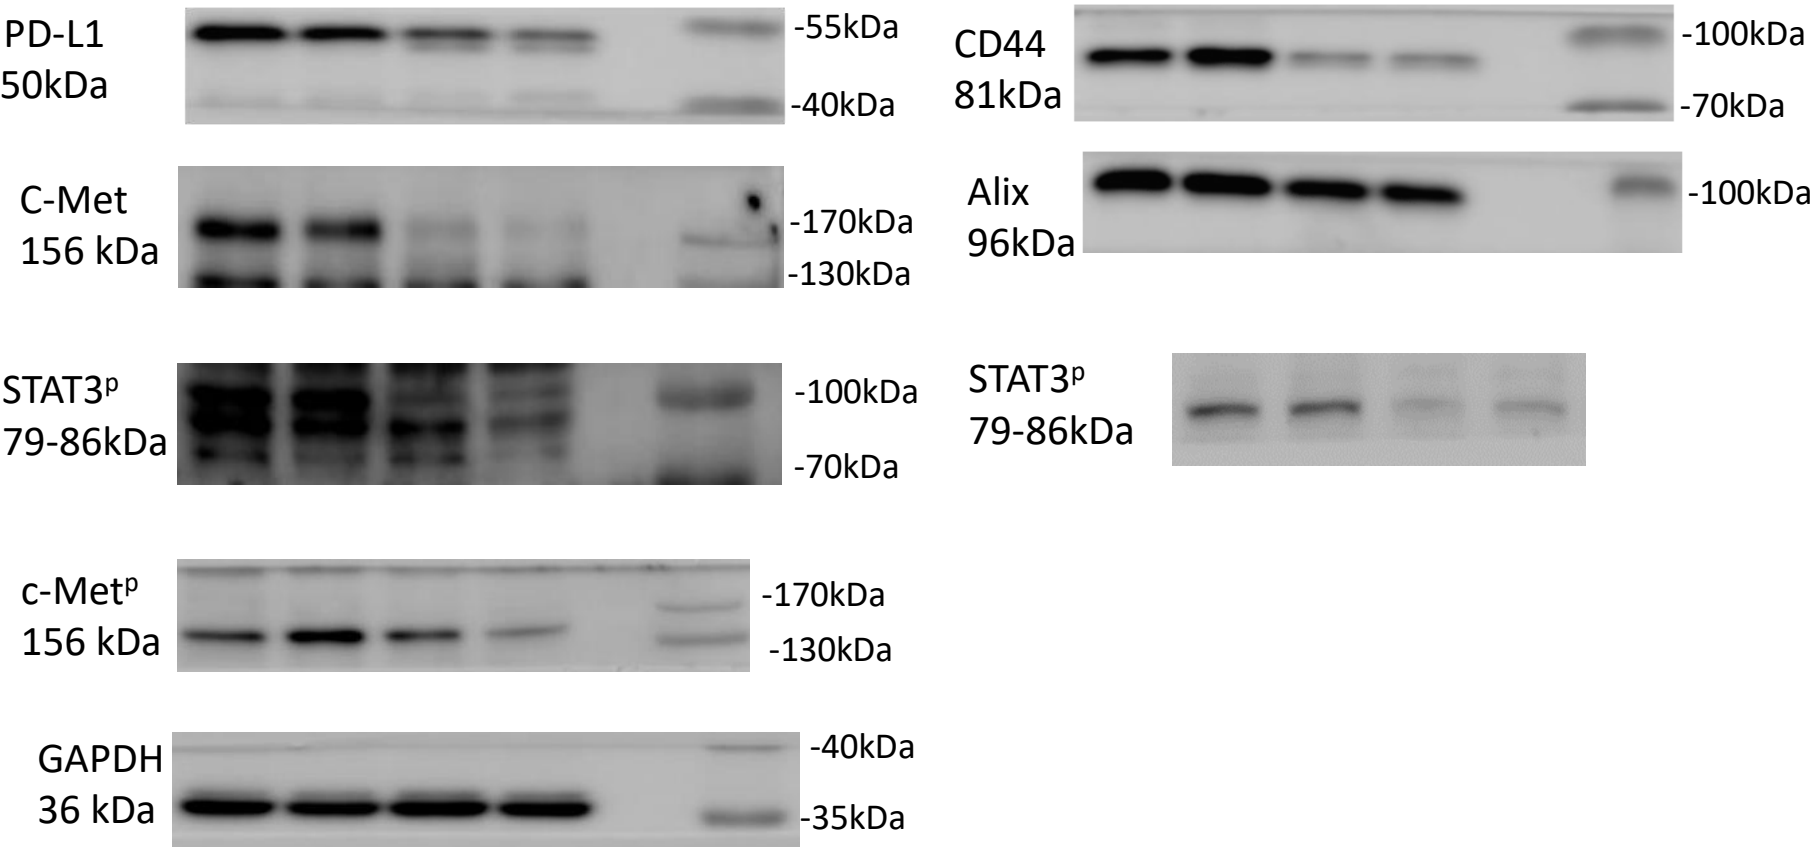

Figure 6

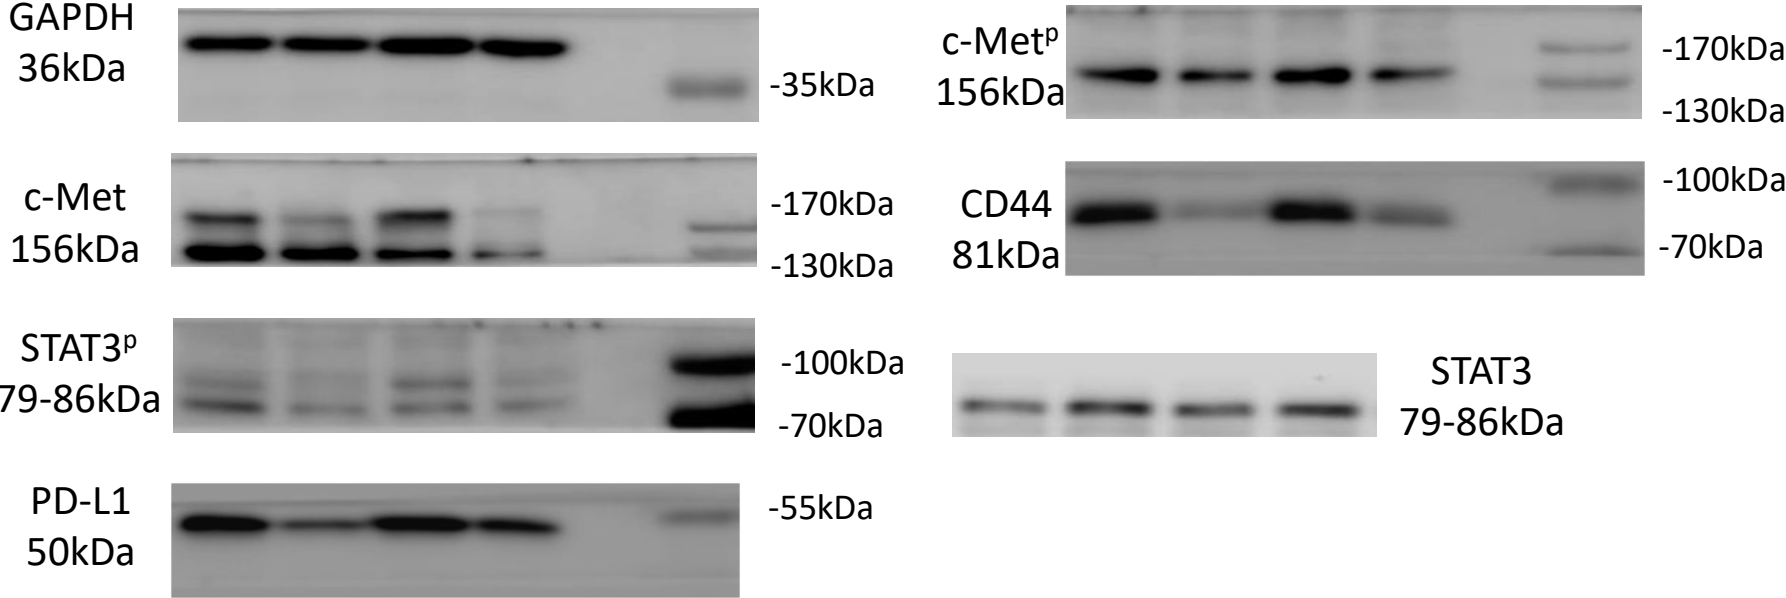

Supplement: s1 [file s1]
